# Supplementary material for: Visualizing atomic structure and magnetism of 2D magnetic insulators via tunneling through graphene
Source: PubMed Central journal article supplement (PMC7782518; doi:10.1038/s41467-020-20376-w), 2021-01-04
Supplement: 41467_2020_20376_MOESM1_ESM.pdf [file 41467_2020_20376_MOESM1_ESM.pdf]

# Supplementary information

## Table of Contents

Section S1. Sample bias dependent STM images of G/FL-CrI<sub>3</sub>/Gr

Section S2. The STM images and STS spectra of G/ML-CrI<sub>3</sub>/Gr

Section S3. Calculated DOS of G/ML-CrI<sub>3</sub> with different Hubbard U

Section S4. The transparency of graphene to tunneling electrons

Section S5. The moiré superlattice of G/FL-CrI<sub>3</sub>/Gr at a twist angle  $\varphi = 16^\circ$

Section S6. The magnetic field dependent  $dI/dV$  maps of G/FL-CrI<sub>3</sub>/Gr

Section S7. The reported magnetic field for AFM-FM transition in FL-CrI<sub>3</sub>

Section S8. The atomic registry dependent electronic structures of G/four-layer CrI<sub>3</sub>

Section S9. Methods for theoretical calculation

### 1. Sample bias dependent STM images of G/FL-CrI<sub>3</sub>/Gr

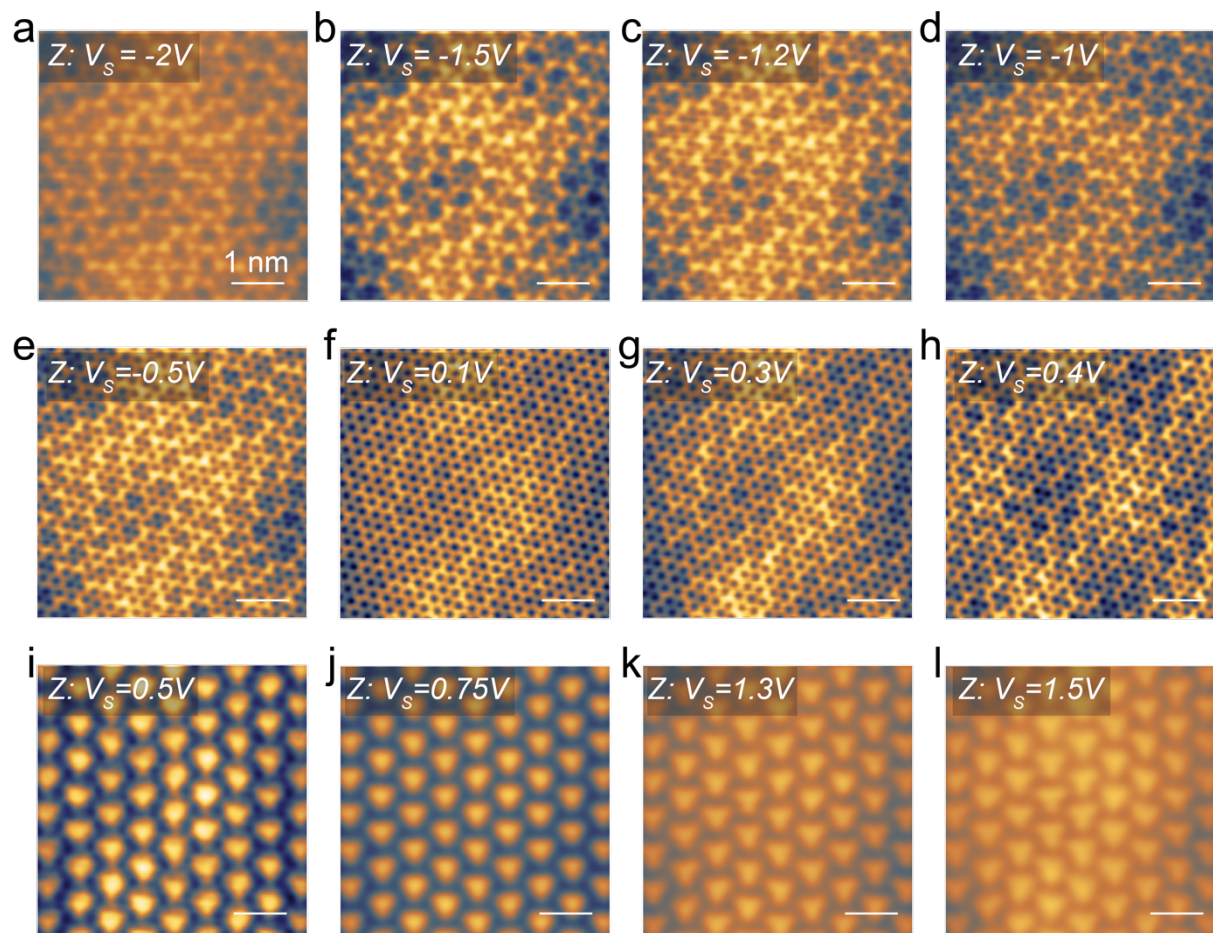

**Figure S1. Sample bias dependent STM images of the G/FL-CrI<sub>3</sub>/Gr.** The tunneling current is 1 nA for all STM images.

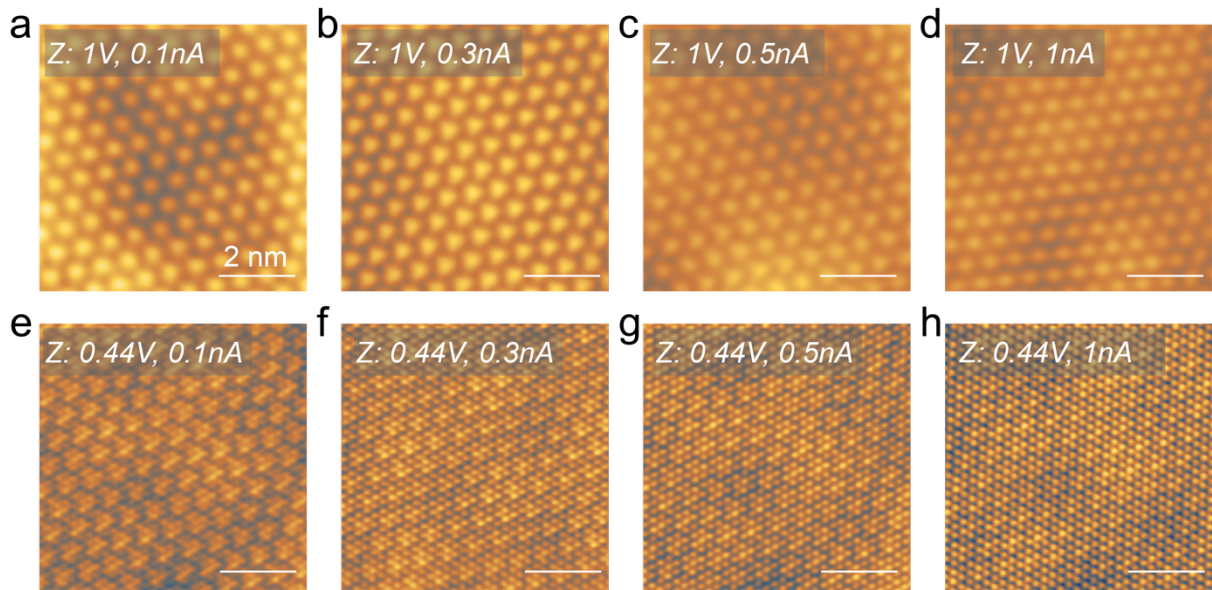

**Figure S2. STM images of the G/FL-CrI<sub>3</sub>/Gr recorded at varied tunneling current.** (a-d) STM images ( $V_s = 1\text{ V}$ ) recorded at varied tunneling current from 0.1 nA to 1 nA. Note the STM images could be taken on different areas. All these STM images resolve CrI<sub>3</sub> lattice, independent of tunneling current. That is because the electronic states probed are deep into the CrI<sub>3</sub> conduction band and thus the CrI<sub>3</sub> states have a major contribution to the tunneling current. (e-h) STM images ( $V_s = 0.44\text{ V}$ ) recorded at varied tunneling current from 0.1 nA to 1 nA. A smaller positive bias ( $V_s = 0.44\text{ V}$ ) probes the electronic states near the CrI<sub>3</sub> conduction band edge as well as graphene states. In this case, the weight of integrated graphene states and integrated CrI<sub>3</sub> states may be comparable so that both graphene lattice and CrI<sub>3</sub> lattice can be resolved. A variation of tunneling current from 0.1 nA to 1 nA has a limited influence on the visualization of graphene lattice. An increase of tunneling current makes the graphene (CrI<sub>3</sub>) lattice slightly more (less) prominent.

## 2. The STM images and STS spectra of G/ML-CrI<sub>3</sub>/Gr

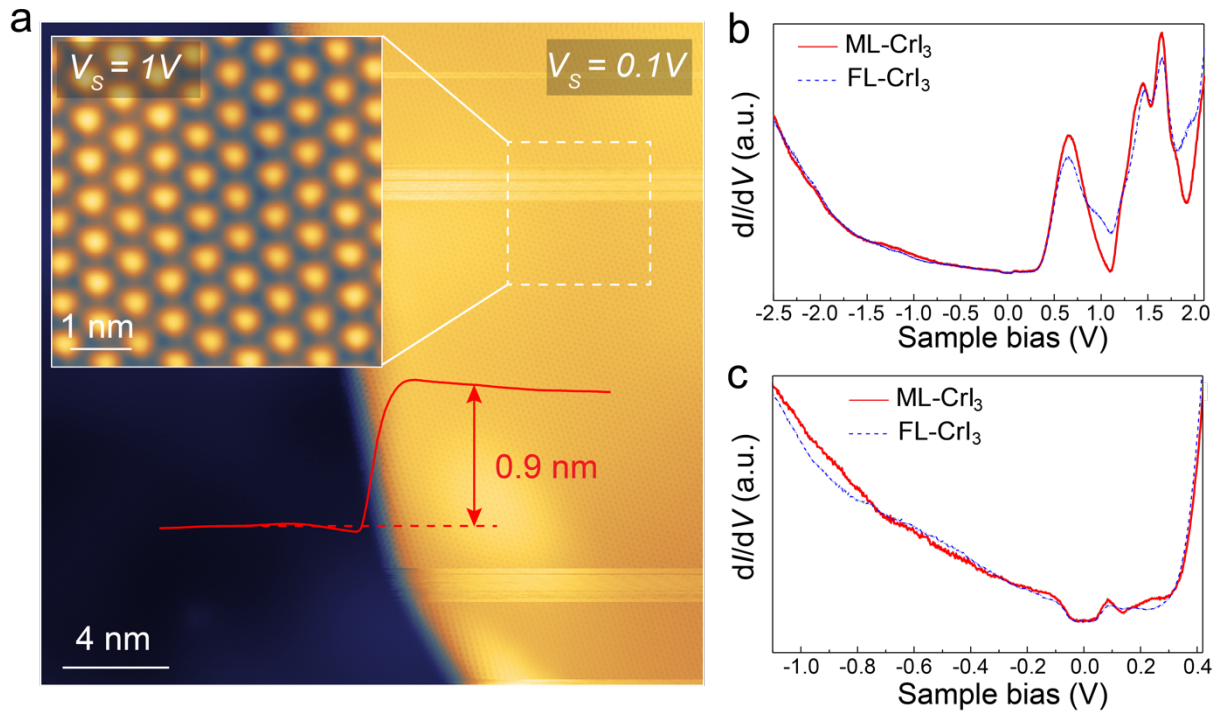

**Figure S3. The STM images and STS spectra of G/ML-CrI<sub>3</sub>/Gr.** (a) STM image of G/ML-CrI<sub>3</sub>/Gr ( $V_s = 0.1$  V,  $I_t = 0.8$  nA). The inset: a zoom-in STM image of the selected area (marked by dash square,  $V_s = 1$  V,  $I_t = 0.1$  nA) shows the CrI<sub>3</sub> lattice. The bottom graphite flake covered by graphene appears as the dark region on the left side of (a), while graphene covered monolayer CrI<sub>3</sub> appears as the bright region on the right side of (a). The line profile (red line) reveals a single-layer step with an apparent height of  $\sim 0.9$  nm. (b) The  $dI/dV$  spectrum of G/ML-CrI<sub>3</sub>/Gr (red solid line) taken in a large sample bias window ( $-2.5$  V  $\leq V_s \leq 2.1$  V), compared with the  $dI/dV$  spectrum of G/FL-CrI<sub>3</sub>/Gr (blue dashed line). (c) The  $dI/dV$  spectrum of G/ML-CrI<sub>3</sub>/Gr (red solid line) taken in a small sample bias window ( $-1.2$  V  $\leq V_s \leq 0.42$  V), compared with the  $dI/dV$  spectrum of G/FL-CrI<sub>3</sub>/Gr (blue dashed line).

### 3. Calculated DOS of G/ML-CrI<sub>3</sub> with different Hubbard U

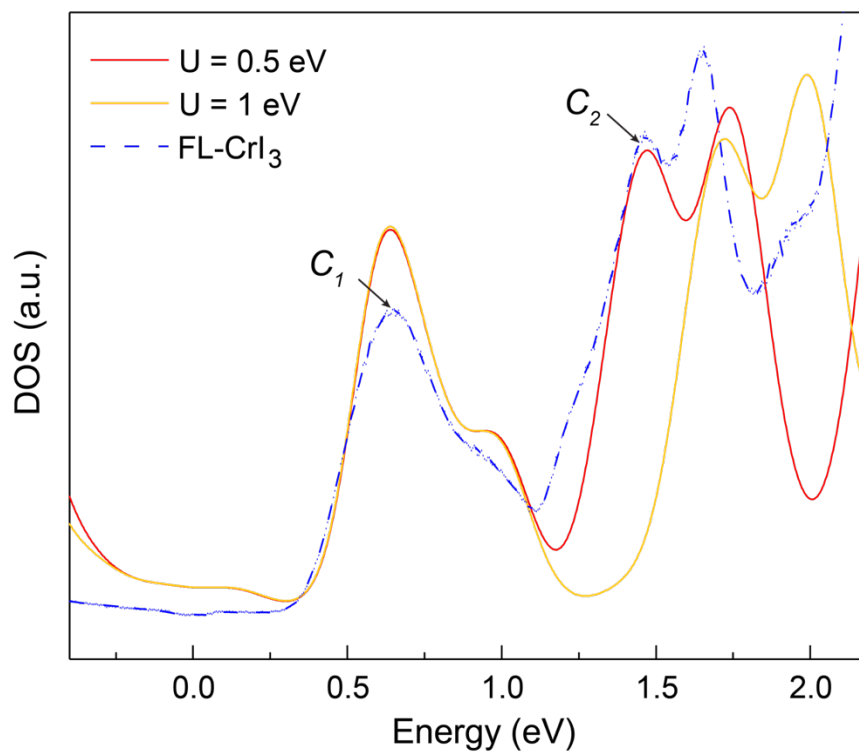

**Figure S4.** Calculated DOS of G/ML-CrI<sub>3</sub> with a Hubbard U of 0.5 eV (solid red line) and 1 eV (solid yellow line) compared with the  $dI/dV$  spectrum of G/FL-CrI<sub>3</sub>/Gr (dashed blue line). Note, the calculated DOS of G/ML-CrI<sub>3</sub> is manually offset by 0.55 eV to align with the energy position of  $C_1$  states resolved in  $dI/dV$  spectrum.

#### 4. The transparency of graphene to tunneling electrons

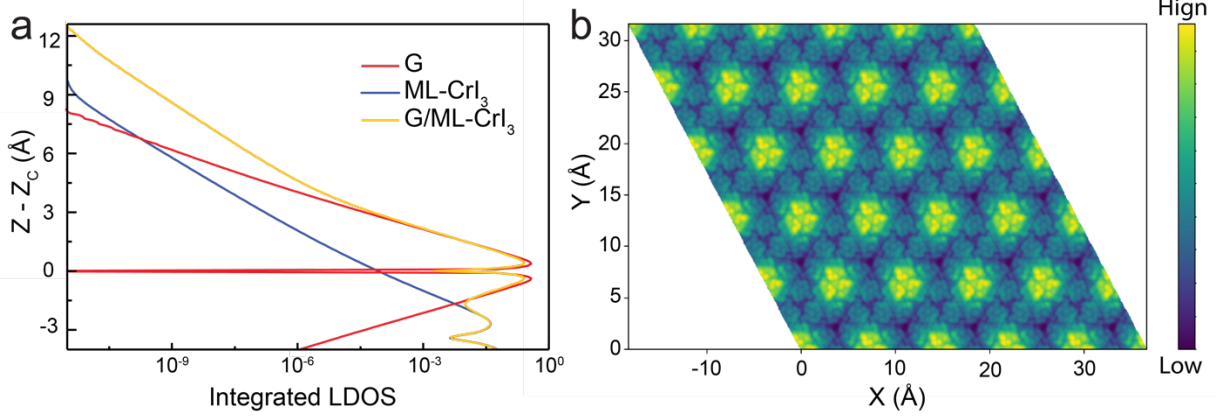

**Figure S5. The transparency of graphene to tunneling electrons.** (a) Integrated LDOS from  $E_F$  to  $E - E_F = 3$  eV for the isolated graphene, ML-CrI<sub>3</sub>, and the hybrid G/ML-CrI<sub>3</sub> as a function of vertical distance. All vertical distances are referenced to the graphene plane ( $Z - Z_c = 0$  Å). (b) Simulated STM image of G/ML-CrI<sub>3</sub> acquired at a vertical distance of  $Z - Z_c = 6$  Å and  $V_s = 3$  V.

With a few assumptions, the LDOS decays exponentially as a function of tip-sample distance  $z^1$ :

$$LDOS(z) = C \cdot e^{-z/\lambda}$$

where  $C$  is a constant,  $\lambda$  is the decay length. The inverse decay length can be written as  $\lambda^{-1} = 2\sqrt{\frac{2m\phi}{\hbar^2} + k_{||}^2}$ , which is determined by the work function  $\phi$  and the in-plane wave vector of the states  $k_{||}$ .

Here we have calculated the vertical decay of the integrated LDOS from  $E_F$  to  $E - E_F = 3$  eV for the isolated graphene, ML-CrI<sub>3</sub>, and the hybrid G/ML-CrI<sub>3</sub> heterostructure with a separation of  $3.5$  Å between graphene and CrI<sub>3</sub> surface. The isolated ML-CrI<sub>3</sub> is vertically offset to align with the CrI<sub>3</sub> in the G/ML-CrI<sub>3</sub> heterostructure. As shown in Figure S5a, the

graphene states undergo a much faster decay than ML-CrI<sub>3</sub> states with a crossover at 7 Å above graphene. It indicates graphene states have a small decay length which can be attributed to the large in-plane wave vector  $k_{\parallel}$  of graphene states<sup>2</sup>. Moreover, the vertical decay of integrated LDOS of the G/ML-CrI<sub>3</sub> hybrid system sets apart from that of graphene at the distance above 4 Å. When the vertical distance is larger than 4 Å ( $Z - Z_c > 4 \text{ Å}$ ), the effective decay length of the G/ML-CrI<sub>3</sub> system is nearly identical to the decay length of ML-CrI<sub>3</sub>, which suggests that the integrated LDOS of G/ML-CrI<sub>3</sub> has a dominant contribution from the underlying ML-CrI<sub>3</sub>. This is consistent with the feature (CrI<sub>3</sub> lattice) observed in the simulated STM image of G/ML-CrI<sub>3</sub> at  $Z - Z_c = 6 \text{ Å}$  and  $V_s = 3 \text{ V}$  (Figure S5b).

## 5. The moiré superlattice of G/FL-CrI<sub>3</sub>/Gr at a twist angle $\varphi = 16^\circ$

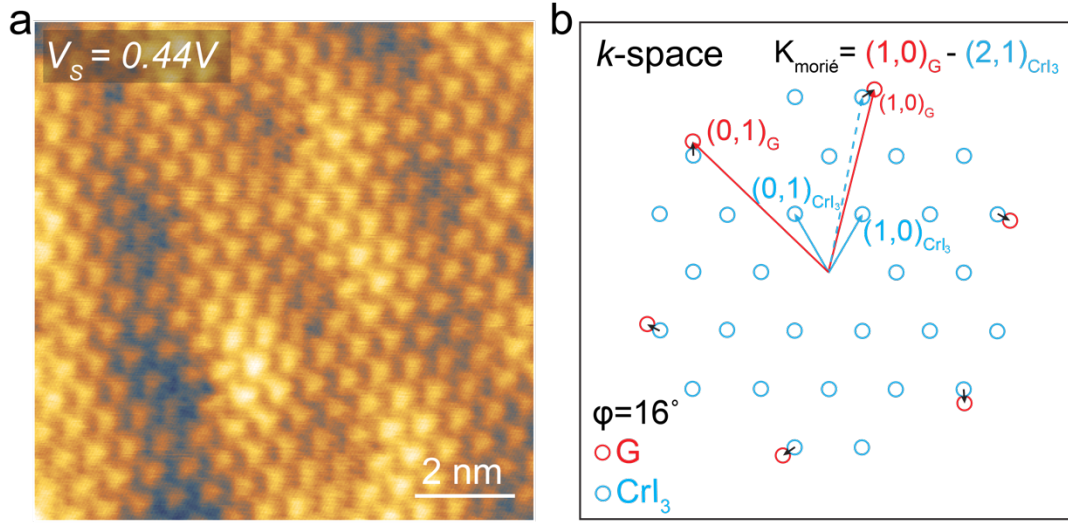

**Figure S6. The moiré superlattice of G/FL-CrI<sub>3</sub>/Gr at a twist angle  $\varphi = 16^\circ$  between graphene and FL-CrI<sub>3</sub>.** (a) STM image ( $V_s = 0.44$  V,  $I_t = 0.3$  nA) in the same area of Figure 4a. (b) The reciprocal lattice of graphene (red circle) and CrI<sub>3</sub> (blue circle) at a twist angle  $\varphi = 16^\circ$ .

We performed the geometrical analysis of the moiré superlattice in G/FL-CrI<sub>3</sub>/Gr. A combination of Figure S6a and Figure 4a reveals a twist angle of  $\varphi = 16^\circ$  between the graphene and FL-CrI<sub>3</sub>. We are able to extract the periodicity and orientation of the moiré superlattice of G/FL-CrI<sub>3</sub> based on this twist angle, in good agreement with the experimental results.

It is noted that the reciprocal lattice vector of moiré pattern ( $\vec{K}_{\text{moiré}}$ ) can be regarded as the difference between the reciprocal lattice vector of graphene and CrI<sub>3</sub><sup>3</sup>. Figure S6b shows the reciprocal lattice vectors of graphene and FL-CrI<sub>3</sub> indexed by vectors  $(r, s)_G$  and  $(m, n)_{CrI_3}$ . As shown in Figure S6b, the  $(1,0)_G$ - and  $(2,1)_{CrI_3}$ - spot almost overlap in  $k$ -space. The difference of two vectors leads to the reciprocal lattice vector of a possible moiré pattern as symmetrically equivalent to:  $\vec{K}_{\text{moiré}} = (1,0)_G - (2,1)_{CrI_3}$ . As a result,  $\vec{K}_{\text{moiré}}$  leads to a moiré superlattice in real space where the moiré length is  $|M_1| = |M_2| = 3.18$  nm and the



rotation angle between graphene and moiré superlattice is  $\theta = 41^\circ$ . Meanwhile, we experimentally determine the periodicity and orientation of moiré superlattice from STM image (Figure 4a). The moiré length is measured to be  $|M_1|' = |M_2|' = 3.14 \pm 0.01$  nm. The angle between graphene and moiré superlattice is measured to be  $\theta' = 41^\circ$ . The simulated results are in good agreement with our experimental observation.

## 6. The magnetic field dependent $dI/dV$ maps of G/FL-CrI<sub>3</sub>/Gr

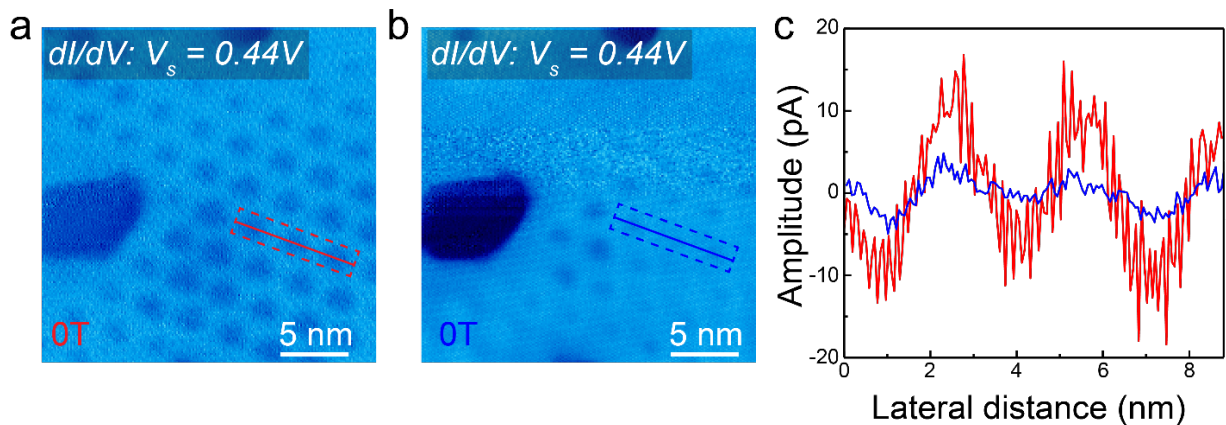

**Figure S7.** The amplitude of moiré contrast in the  $dI/dV$  maps of G/FL-CrI<sub>3</sub>/Gr ( $V_s = 0.44$  V,  $I_t = 0.5$  nA). (a) The  $dI/dV$  map taken at the initial stage ( $\mu_0 H = 0$  T) before ramping up the magnetic field. (b) The  $dI/dV$  map taken at the final stage ( $\mu_0 H = 0$  T) after ramping down the magnetic field. (c) The line profiles across the indicated areas in the  $dI/dV$  maps. The difference between the maximum and minimum  $dI/dV$  signal is defined as the amplitude of moiré contrast, which is measured to be  $\sim 20$  pA in image (a) and reduced to  $\sim 6$  pA in image (b).

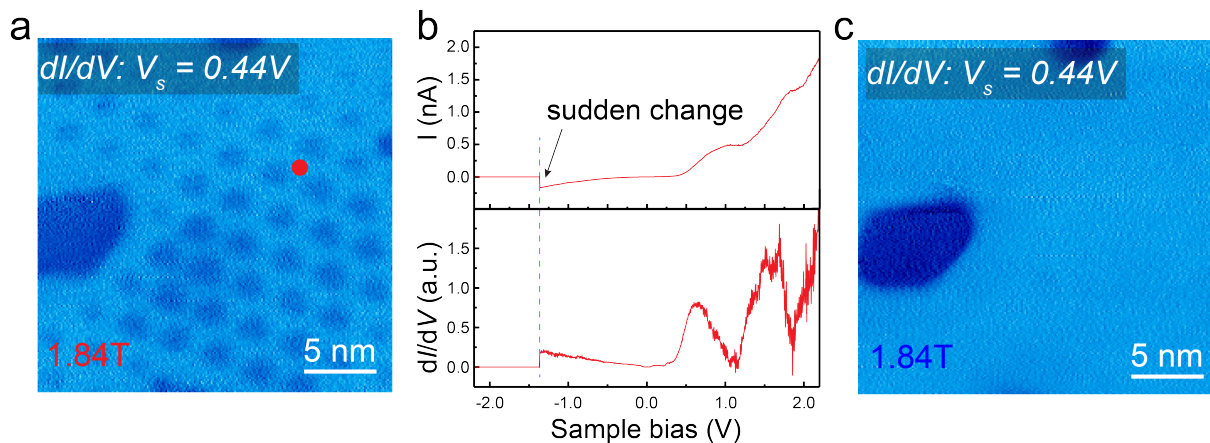

**Figure S8.** AFM-FM magnetic phase transition induced by the magnetic field with the assistance of tip-induced local gating. (a) The  $dI/dV$  map ( $V_s = 0.44$  V,  $I_t = 0.5$  nA) upon the application of  $1.84$  T magnetic field. We then took point  $dI/dV$  spectroscopy (the tip position is indicated by the red dot). (b) A sudden change of the  $I-V$  and  $dI/dV$  signal. (c) The  $dI/dV$  map ( $V_s = 0.44$  V,  $I_t = 0.5$  nA) taken after the sudden change of the  $dI/dV$  signal. The sudden change of  $I-V$  and  $dI/dV$  signal is likely to be associated with an abrupt AFM-FM magnetic phase transition induced by the magnetic field with the assistance of tip-induced local gating.

This can be attributed to the magneto-electric effect and the influence of doping on magnetization reported in previous studies<sup>4-6</sup>.

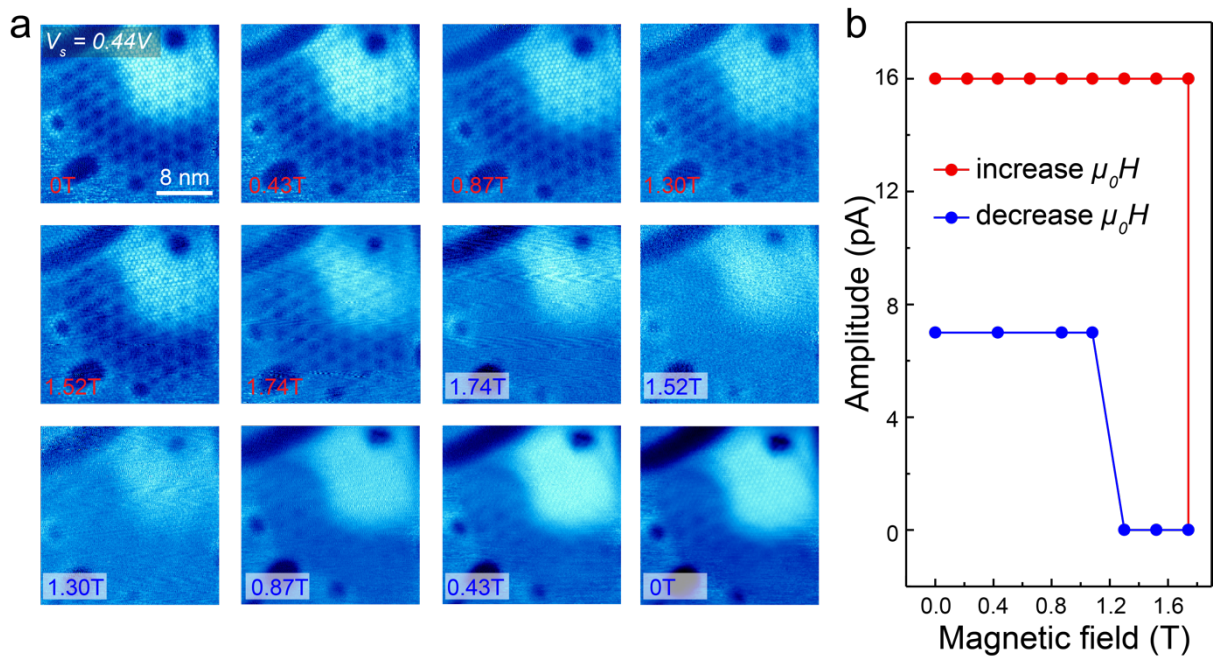

**Figure S9. Magnetic field dependent moiré contrast in  $dI/dV$  maps.** (a) Another set of magnetic field dependent  $dI/dV$  maps of G/FL-CrI<sub>3</sub>/Gr ( $V_s = 0.44$  V,  $I_t = 0.5$  nA). The critical field was 1.74 T when moiré contrast disappeared. (b) Magnetic field dependent moiré contrast in the  $dI/dV$  maps taken at  $V_s = 0.44$  V and  $I_t = 0.5$  nA.

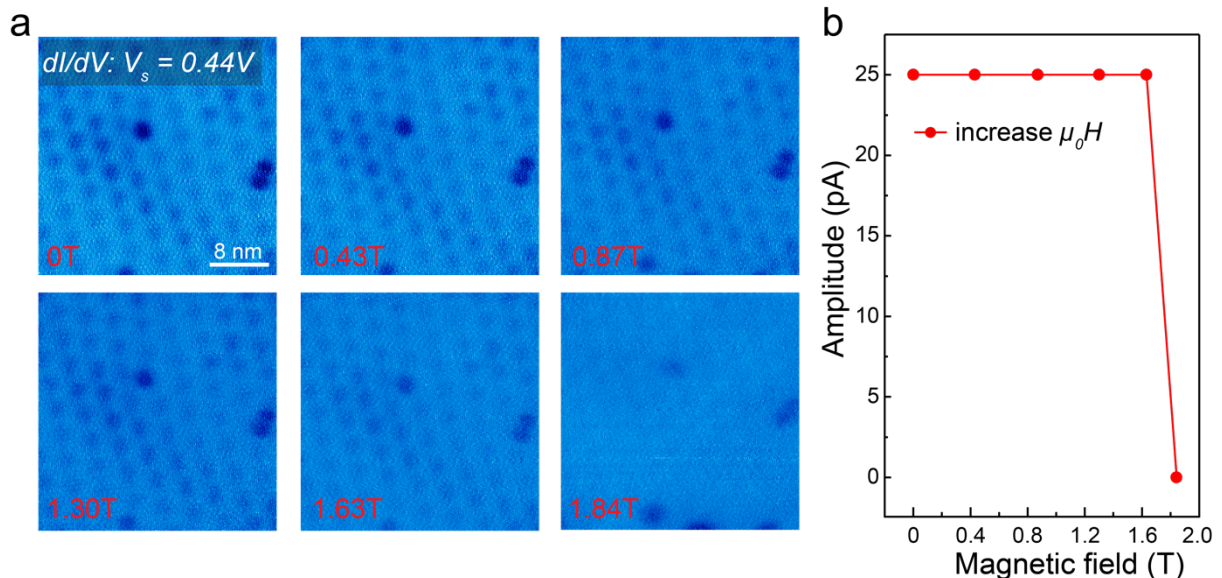

**Figure S10. Moiré contrast in the  $dI/dV$  map vanished right after applying a magnetic field of 1.84 T in certain sample regions.** (a) Magnetic field dependent  $dI/dV$  maps of G/FL-CrI<sub>3</sub>/Gr ( $V_s = 0.44$  V,  $I_t = 1$  nA). (b) Magnetic field dependent moiré contrast in the  $dI/dV$  maps ( $V_s = 0.44$  V,  $I_t = 1$  nA).

## 7. The reported magnetic field for AFM-FM transition in FL-CrI<sub>3</sub>

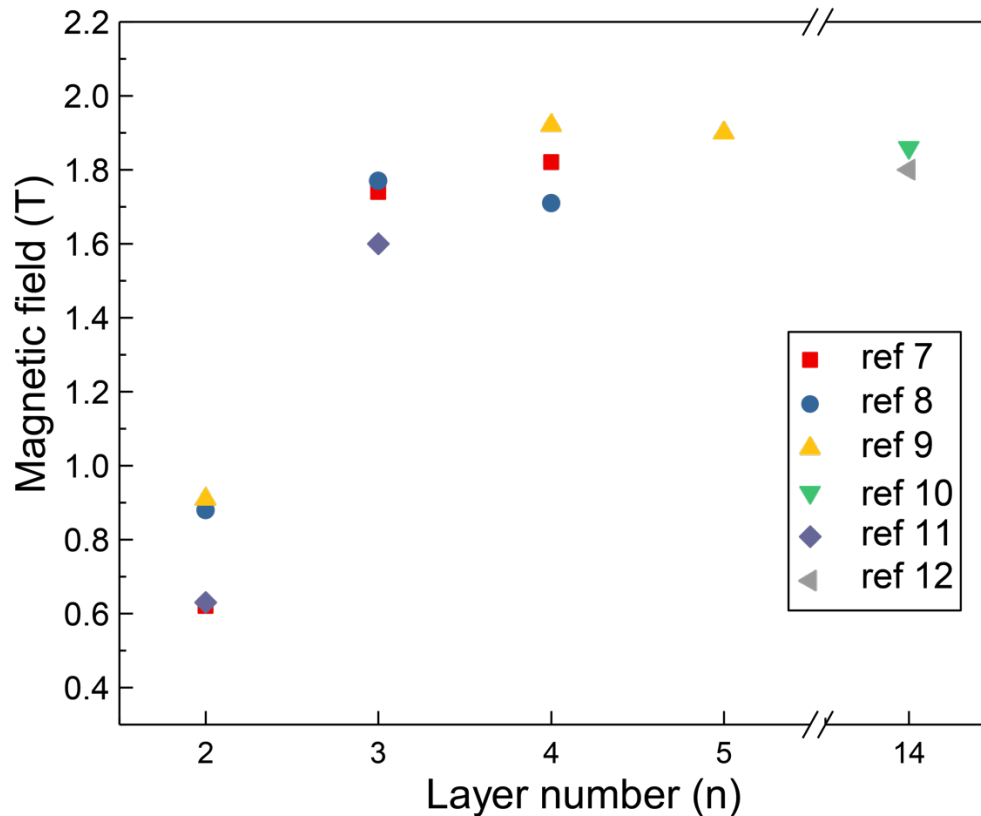

**Figure S11.** The typical magnetic field for AFM-FM transition on FL-CrI<sub>3</sub> in the previous reports<sup>7-12</sup>. The critical magnetic field for AFM-FM transition in thin CrI<sub>3</sub> flakes (layer number  $n > 2$ ) is reported to be ranged from 1.60 T to 1.92 T (average value of  $1.79 \pm 0.10$  T). The variation of the critical magnetic field is likely due to the sample-to-sample difference, the formation of domain structures and the influence of local environment<sup>4,13,14</sup>. Unfortunately, 1.84 T is the upper limit of the magnetic field in our system, which may be insufficient to flip the spin in certain sample regions. In such a case, AFM-FM phase transition could be triggered with the assistance of tip-induced local gating during  $dI/dV$  spectroscopic measurement, as illustrated in Figure S8. In addition, in the certain region of sample, we also observed that moiré contrast vanished in the  $dI/dV$  map immediately at a magnetic field of 1.84 T as shown in Figure S10.

## 8. The atomic registry dependent electronic structures of G/four-layer CrI<sub>3</sub>

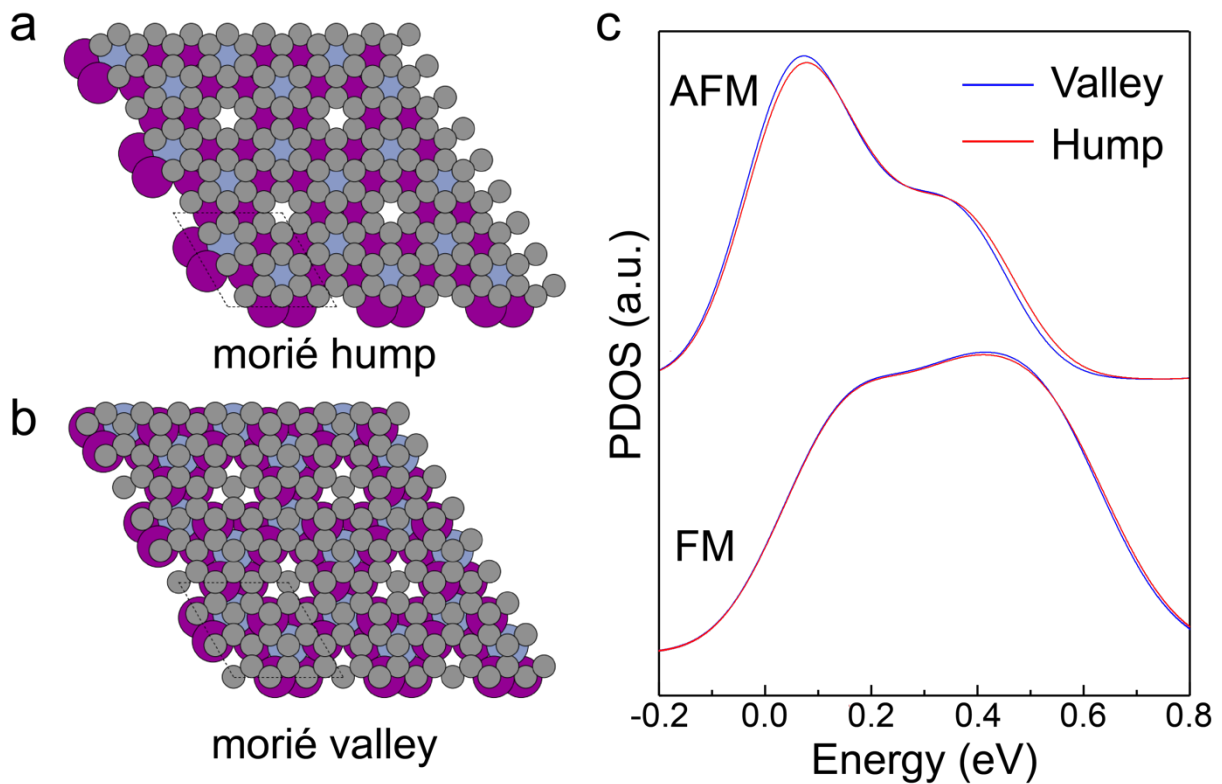

**Figure S12. The atomic registry dependent electronic structures of G/four-layer CrI<sub>3</sub>.** (a) The atomic model of moiré hump. (b) The atomic model of moiré valley. (c) Calculated PDOS of top CrI<sub>3</sub> layer in moiré valley (blue) and moiré hump (red) when four-layer CrI<sub>3</sub> are AFM-coupled and FM-coupled.

A direct simulation of the large moiré superlattice of G/FL-CrI<sub>3</sub> at a twist angle  $\varphi = 16^\circ$  is computationally costly, beyond the capability of our computation power. To qualitatively demonstrate the atomic registry dependent electronic structure of G/FL-CrI<sub>3</sub> by DFT calculations, we use a  $(3 \times 3)$  supercell of graphene placed on a single unit cell of four-layer CrI<sub>3</sub> with different atomic arrangements to mimic the local atomic registry in moiré hump and moiré valley separately (Figure S12a-b). Figure S12c compares the PDOS of top CrI<sub>3</sub> layer in moiré valley and moiré hump under different magnetic order. Specifically, when the four-layer CrI<sub>3</sub> is interlayer AFM-coupled, there is a small but noticeable difference between PDOS

in the moiré hump and valley. By contrast, PDOS of top CrI<sub>3</sub> layer are nearly same in moiré hump and valley when four-layer CrI<sub>3</sub> are interlayer FM-coupled.

## 9. Method for theoretical calculation

The DFT calculations were performed with the electronic structure software package GPAW<sup>15,16</sup> using the projector augmented wave method and a plane wave basis. The LDA+U functional was used in the Dudarev approach<sup>17</sup> with a value of U=0.5 eV for the Cr *d*-orbitals. The value of U was chosen in order to reproduce the distance between the *C*<sub>1</sub> and *C*<sub>2</sub> peaks obtained from STS. Unless otherwise specified, for all calculations we considered a single unit cell of CrI<sub>3</sub> with (3 × 3) unit cells of graphene adsorbed. The CrI<sub>3</sub> layers were stretched by 7% in order to obtain a lattice match with the LDA-optimized (3 × 3) graphene unit cell. In all calculations, we employed a 12 × 12 Monkhorst-Pack grid of k-points, a Fermi smearing of 1 meV and a planewave cutoff of 600 eV. The structures were relaxed until all forces were less than 0.01 eV/Å. We considered the two adsorption geometries shown in Figure S12a-b. The graphene sheet shows a slightly stronger binding to CrI<sub>3</sub> in the hump geometry compared to that in the valley geometry. The binding energy difference between the two geometries is determined to be approximately 1 meV per C atom. All band structures, wavefunctions and projected density of states were performed with a non-selfconsistent inclusion of spin-orbit coupling<sup>18</sup>.

The simulated STS and STM images were carried out with a modified Tersoff-Hamann approach<sup>1</sup> with the local density of states (LDOS) being obtained as

$$LDOS(\mathbf{r}) = \sum_{nk} f_{nk} |\psi_{nk}(x, y, z)|^2 \delta(\varepsilon_{nk} - eV_{bias}) e^{-\alpha w_{nk}},$$

where  $\varepsilon_{nk}$  is eigenenergy of the state  $\psi_{nk}$ ,  $f_{nk}$  are the occupation numbers and

$$w_{nk} = \sum_{ia} |\langle \psi_{nk} | \varphi_i^{c,a} \rangle|^2$$

is the total weight of the state  $\psi_{nk}$  on the graphene sheet (the state  $\varphi_i^{c,a}$  is atomic orbital  $i$  on carbon atom  $a$ ). Thus the graphene states can be projected out of the LDOS by choosing a finite value of  $\alpha$ .

### Reference:

- 1 Tersoff, J. & Hamann, D. R. Theory and application for the scanning tunneling microscope. *Phys. Rev. Lett.* **50**, 1998 (1983).
- 2 González-Herrero, H. c. et al. Graphene tunable transparency to tunneling electrons: a direct tool to measure the local coupling. *ACS Nano* **10**, 5131-5144 (2016).
- 3 Zeller, P. & Günther, S. What are the possible moiré patterns of graphene on hexagonally packed surfaces? Universal solution for hexagonal coincidence lattices, derived by a geometric construction. *New J. Phys.* **16**, 083028 (2014).
- 4 Jiang, S., Shan, J. & Mak, K. F. Electric-field switching of two-dimensional van der Waals magnets. *Nat. Mater.* **17**, 406-410 (2018).
- 5 Jiang, S., Li, L., Wang, Z., Mak, K. F. & Shan, J. Controlling magnetism in 2D CrI<sub>3</sub> by electrostatic doping. *Nat. Nanotech.* **13**, 549-553 (2018).
- 6 Jiang, S., Li, L., Wang, Z., Shan, J. & Mak, K. F. Spin tunnel field-effect transistors based on two-dimensional van der Waals heterostructures. *Nat. Electron.* **2**, 159-163 (2019).
- 7 Song, T. et al. Giant tunneling magnetoresistance in spin-filter van der Waals heterostructures. *Science* **360**, 1214-1218 (2018).
- 8 Klein, D. R. et al. Probing magnetism in 2D van der Waals crystalline insulators via electron tunneling. *Science* **360**, 1218-1222 (2018).
- 9 Li, T. et al. Pressure-controlled interlayer magnetism in atomically thin CrI<sub>3</sub>. *Nat. Mater.* **18**, 1303-1308 (2019).
- 10 Zhong, D. et al. Van der Waals engineering of ferromagnetic semiconductor heterostructures for spin and valleytronics. *Sci. Adv.* **3**, e1603113 (2017).
- 11 Song, T. et al. Switching 2D magnetic states via pressure tuning of layer stacking. *Nat. Mater.* **18**, 1-5 (2019).

- 12 Wang, Z. et al. Very large tunneling magnetoresistance in layered magnetic semiconductor CrI<sub>3</sub>. *Nat. Commun.* **9**, 1-8 (2018).
- 13 Huang, B. et al. Layer-dependent ferromagnetism in a van der Waals crystal down to the monolayer limit. *Nature* **546**, 270-273 (2017).
- 14 Thiel, L. et al. Probing magnetism in 2D materials at the nanoscale with single-spin microscopy. *Science* **364**, 973-976 (2019).
- 15 Enkovaara, J. e. et al. Electronic structure calculations with GPAW: a real-space implementation of the projector augmented-wave method. *J. Phys. Condens. Matter.* **22**, 253202 (2010).
- 16 Larsen, A. H. et al. The atomic simulation environment—a Python library for working with atoms. *J. Phys. Condens. Matter.* **29**, 273002 (2017).
- 17 Mosey, N. J. & Carter, E. A. Ab initio evaluation of Coulomb and exchange parameters for DFT+ U calculations. *Phys. Rev. B* **76**, 155123 (2007).
- 18 Olsen, T. Designing in-plane heterostructures of quantum spin Hall insulators from first principles: 1T'– MoS<sub>2</sub> with adsorbates. *Phys. Rev. B* **94**, 235106 (2016).
